# Supplementary material for: The novel anti-colitic effect of β-adrenergic receptors via modulation of PS1/BACE-1/Aβ axis and NOTCH signaling in an ulcerative colitis model
Source: Frontiers journal article supplement (doi:10.3389/fphar.2022.1008085), 2022-10-25

### Supplementary Data

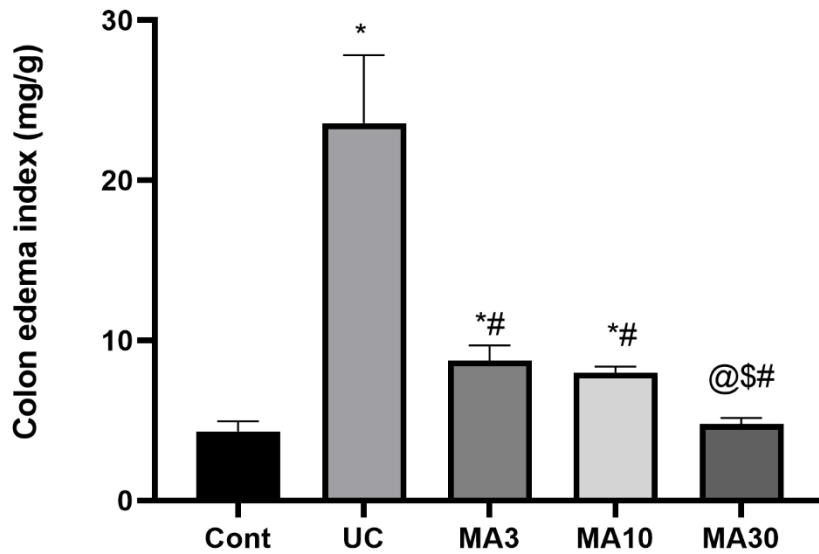

**Figure 1S: Effect of MA3, MA10 and MA30 on colon edema index in rats with IAA-induced UC.** Data are presented as mean  $\pm$  SD (n = 6). Statistical analysis was carried out using one-way ANOVA followed by Tukey's *posthoc* test;  $P < 0.05$ . As compared to (\*) CONT, (#) UC, (@) MA3 and (\$) MA10 groups. CONT: control; MA: mirabegron and UC: ulcerative colitis.

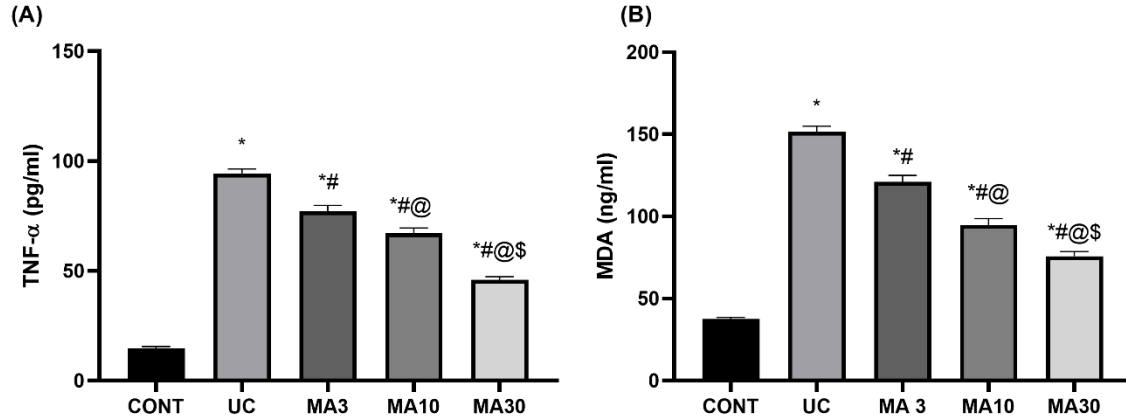

**Figure 2S: Effect of MA3, MA10, and MA30 on the colon protein content of (A) TNF- $\alpha$  and (B) MDA in rats with IAA-induced UC.** Data are presented as mean  $\pm$  SD (n = 6). Statistical analysis was carried out using one-way ANOVA followed by Tukey's *post-hoc* test; P < 0.05. As compared to (\*) CONT, (#) UC, (@) MA3, and (\$) MA10 groups. CONT: control; MA: mirabegron; MDA: malondialdehyde; TNF- $\alpha$ : tumor necrosis factor-alpha; UC: ulcerative colitis.

**Western uncropped photos**

**BACE-1**

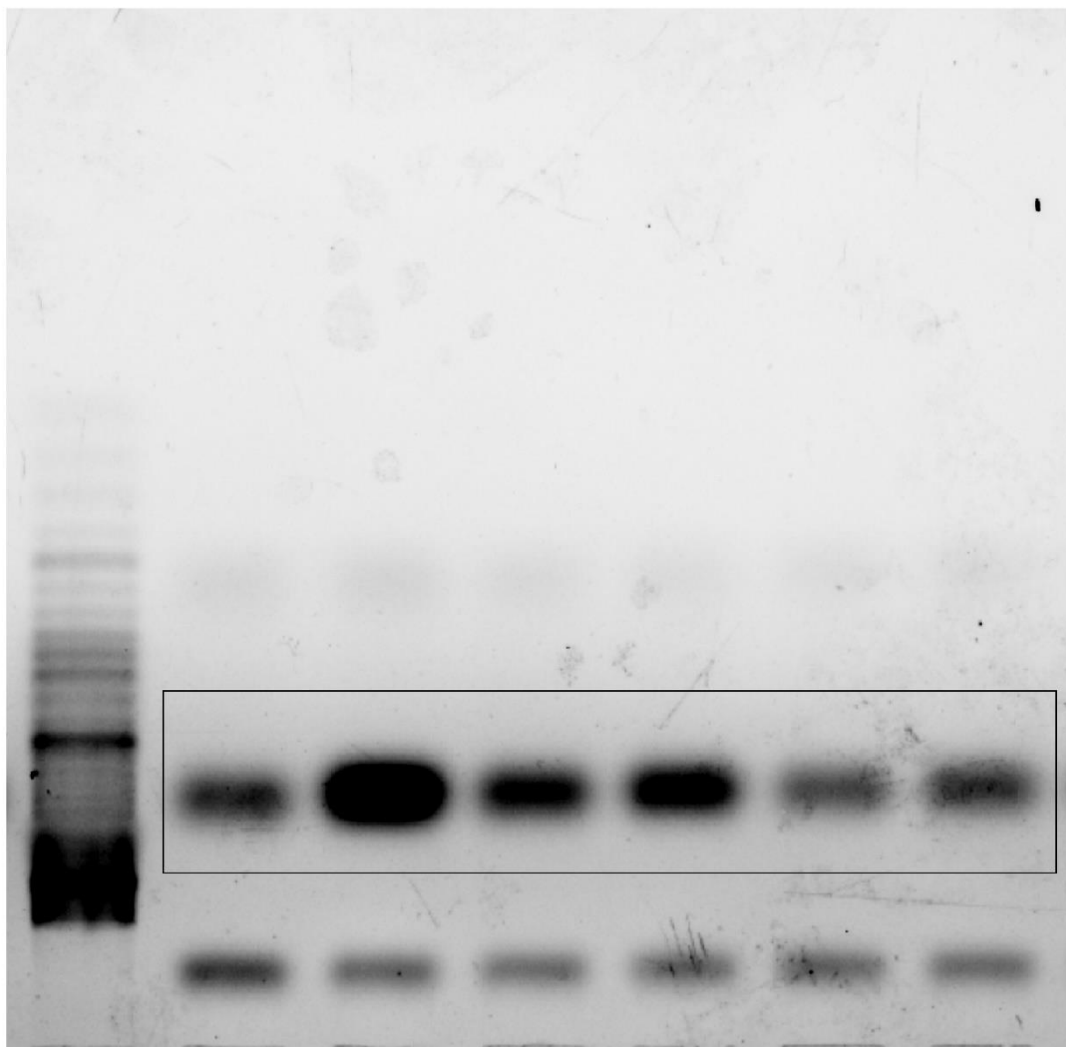

*pY654-β-Catenin*

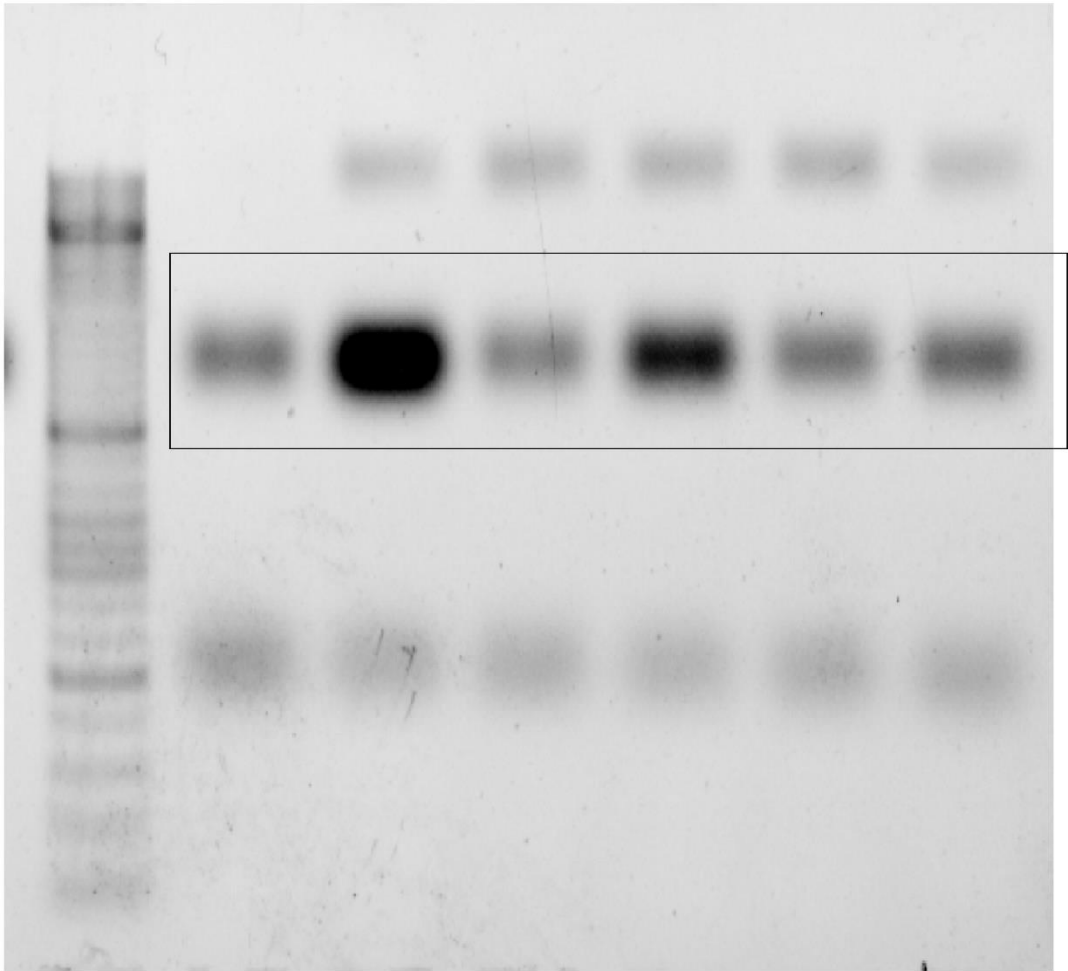

pS9-GSK3-β

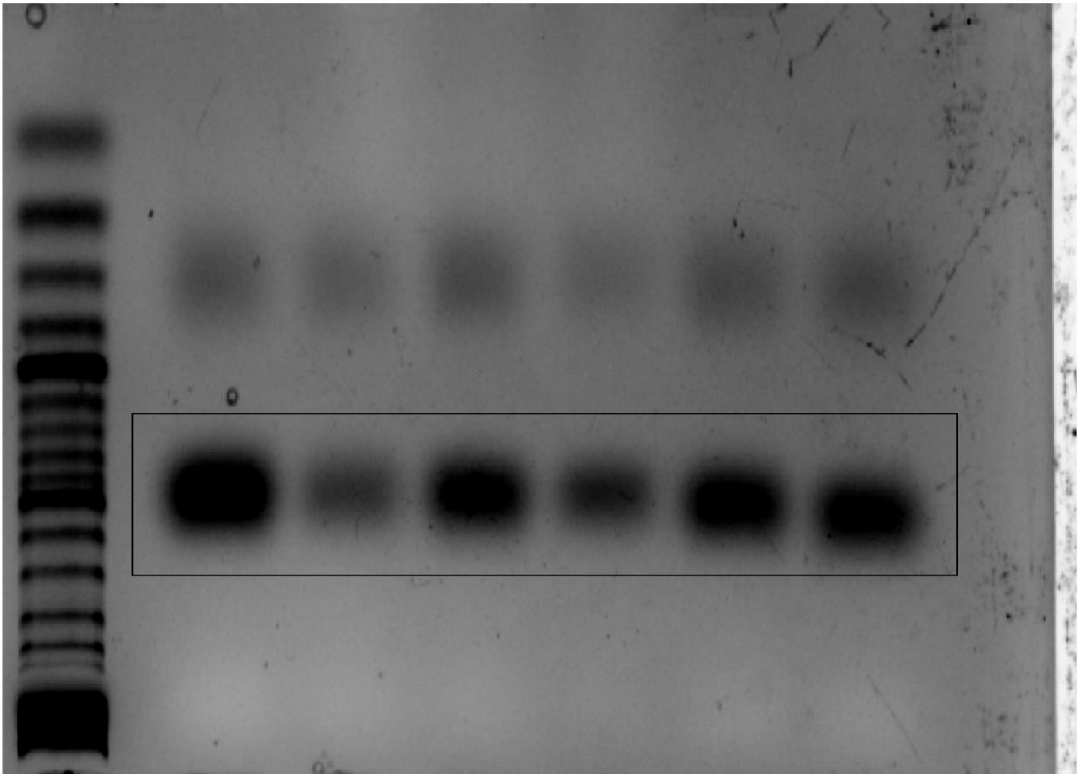

NICD

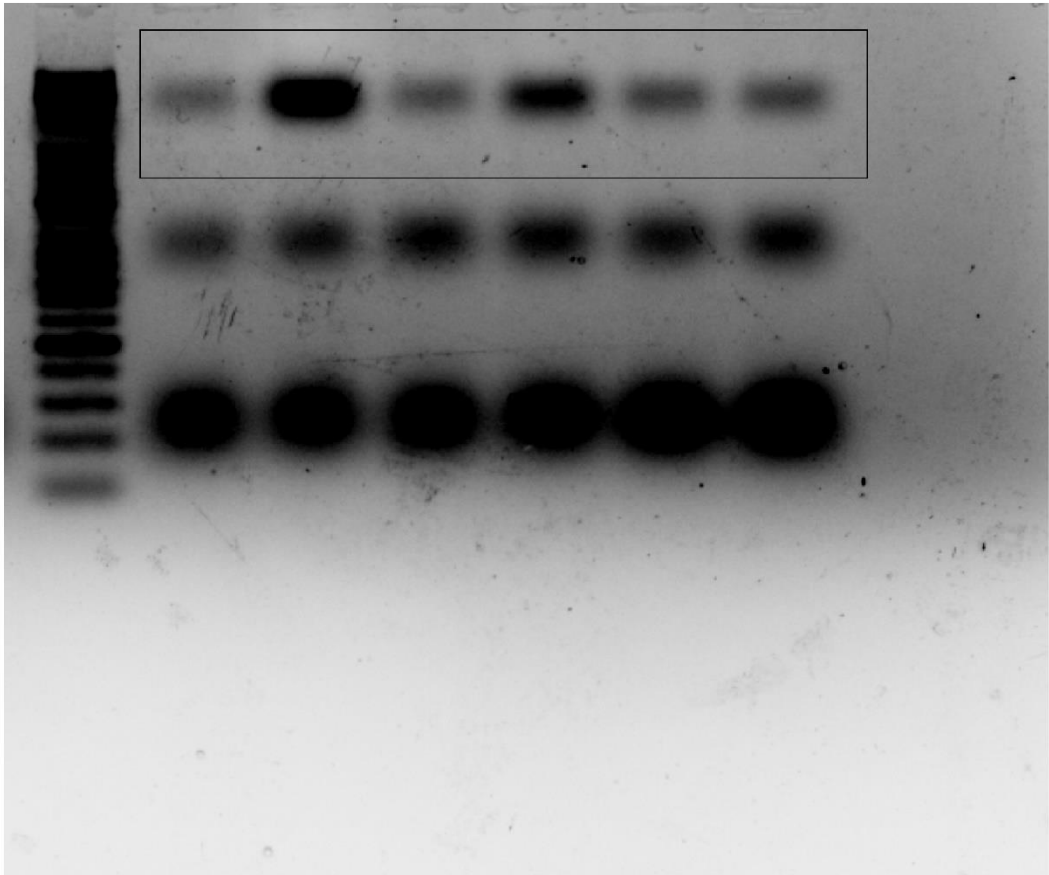

***p*S353-Presenilin**

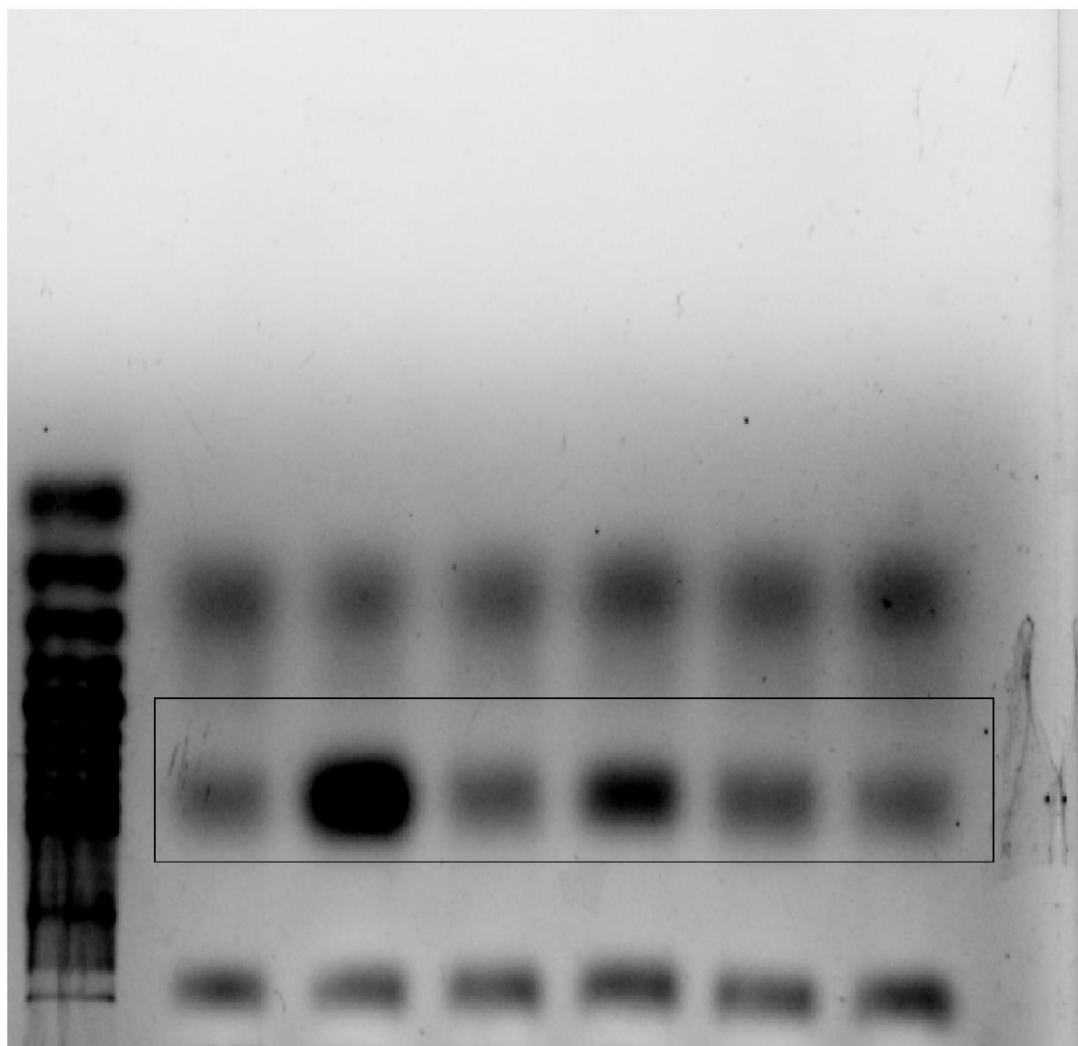

**Total presenilin**

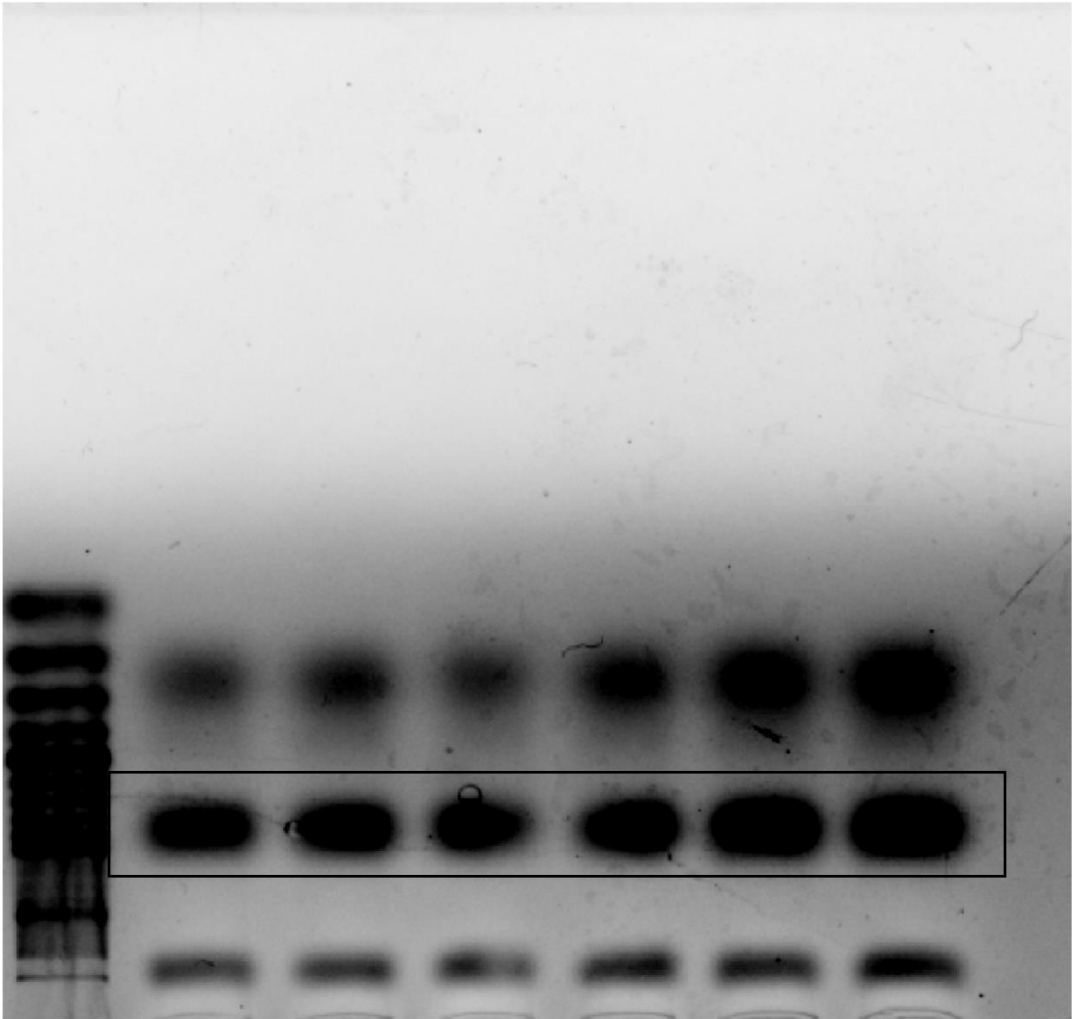



**$\beta$ -Actin**

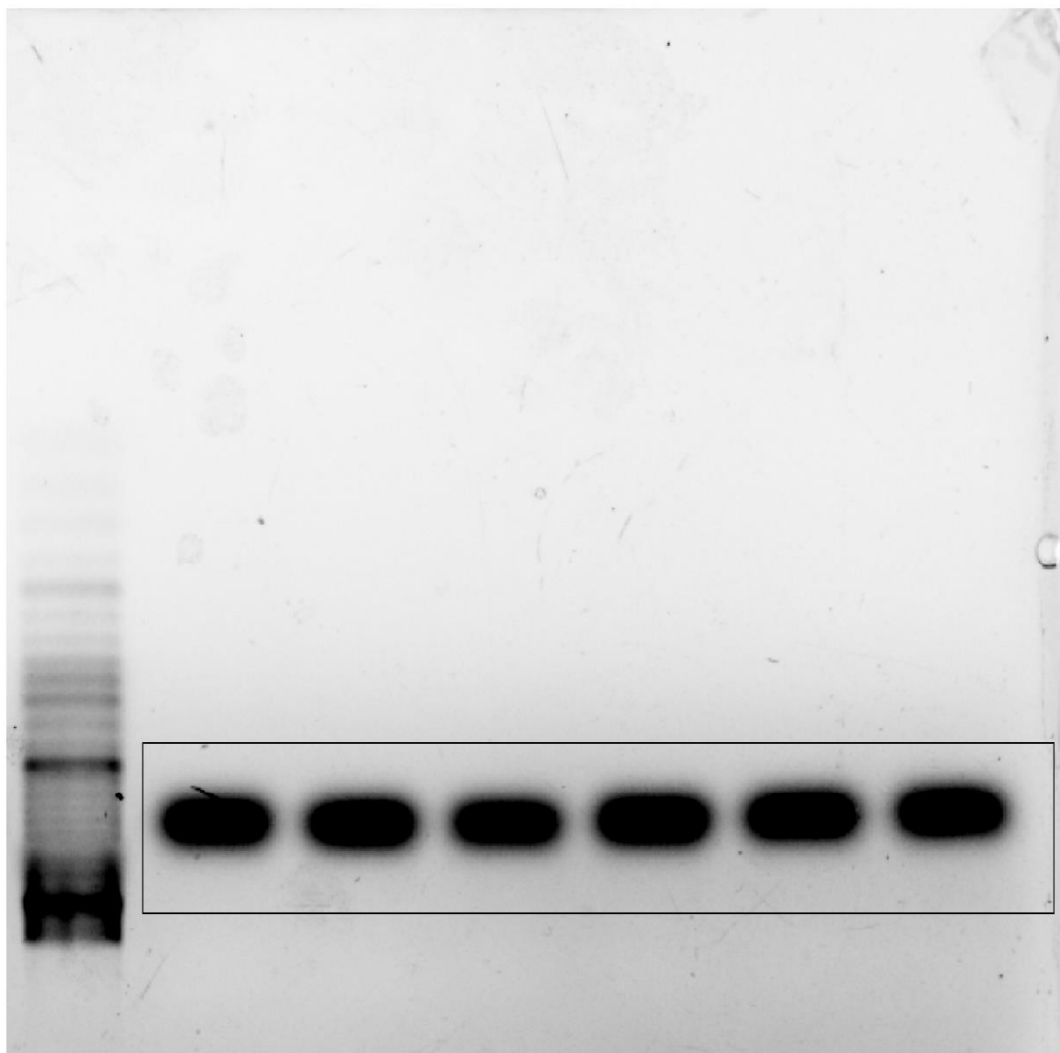

Supplement: Data_Sheet_1.pdf [file Data_Sheet_1.pdf]
